# Supplementary material for: Hepatic stellate cells limit hepatocellular carcinoma progression through the orphan receptor endosialin
Source: PubMed Central journal article supplement (PMC5452049; doi:10.15252/emmm.201607222), 2017-04-03
Supplement: EMMM-9-741-s001.pdf [file EMMM-9-741-s001.pdf]

# Appendix

## Hepatic stellate cells limit hepatocellular carcinoma progression through the orphan receptor endosialin

Carolin Mogler,<sup>1,2,3\*</sup> Courtney König<sup>1,4\*</sup>, Matthias Wieland<sup>1,4</sup>, Anja Runge<sup>1,4</sup>, Eva Besemfelder<sup>1</sup>, Dorde Komljenovic<sup>5</sup>, Thomas Longerich<sup>6</sup>, Peter Schirmacher<sup>2</sup>, and Hellmut G. Augustin<sup>1,4,7</sup>

<sup>1</sup>Division of Vascular Oncology and Metastasis, German Cancer Research Center Heidelberg (DKFZ-ZMBH Alliance), Germany; <sup>2</sup>Institute of Pathology, Heidelberg University, Germany; <sup>3</sup>Institute of Pathology, Technical University Munich, Germany; <sup>4</sup>Department of Vascular Biology and Tumor Angiogenesis (CBTM), Medical Faculty Mannheim, Heidelberg University, Germany; <sup>5</sup>Department of Medical Physics in Radiology, German Cancer Research Center Heidelberg, Germany; <sup>6</sup>Institute of Pathology, RWTH Aachen, Germany; <sup>7</sup>German Cancer Consortium, Heidelberg Germany.

## Table of contents

**Appendix Figure S1:** Endosialin expression on human dysplastic nodules (whole tissue slides).

**Appendix Figure S2:** Heterogeneous Endosialin expression on HCC tissue microarray punches.

**Appendix Figure S3:** Co-stainings of Endosialin and CD31 on human HCC.

**Appendix Figure S4:** Immunohistochemical analysis of non-tumorigenic WT and Endosialin-deficient livers.

**Appendix Figure S5:** Computer tomographical analysis of tumorigenic WT and Endosialin-deficient mice.

**Appendix Figure S6:** Expression profiling and functional analysis of conditioned media from nsEN and shEN HSC.

**Appendix Table S1:** Complete list of cytokines analyzed in the conditioned media of shEN and nsEN HSC.

## Appendix Figure S1

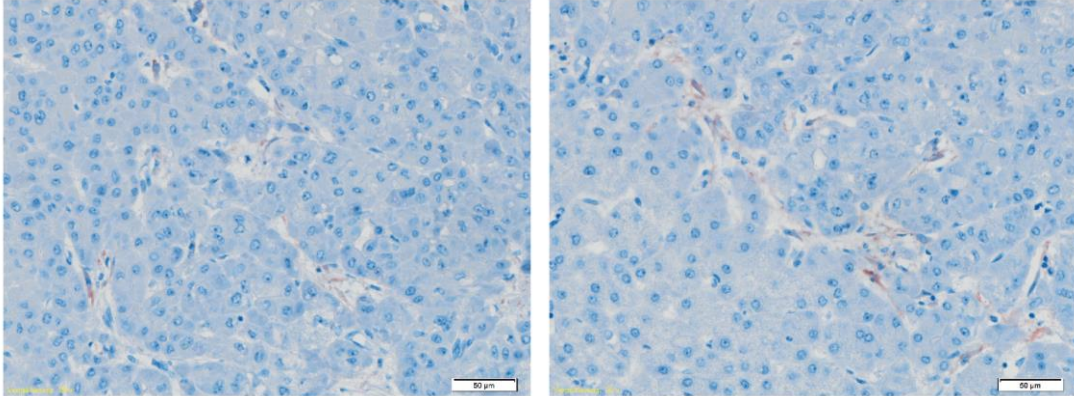

**Appendix Figure S1. Endosialin expression on human dysplastic nodules (whole tissue slides).** Immunohistochemical staining for Endosialin on whole tissues slides of Dysplastic nodules (200x magnification). Scale bar: as indicated.

## Appendix Figure S2

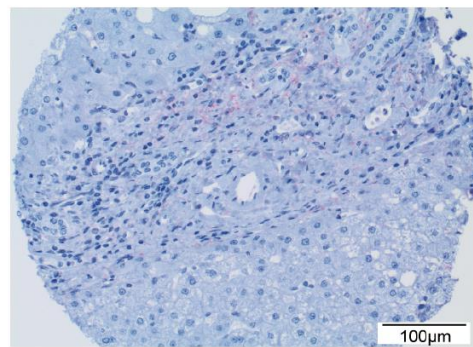

Peritumorous liver

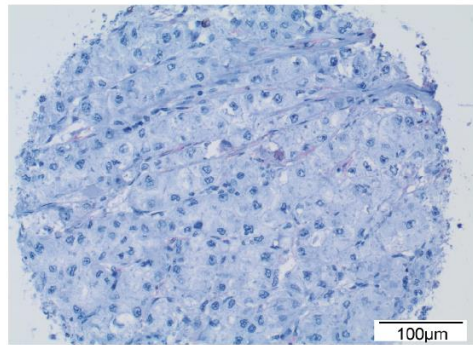

HCC

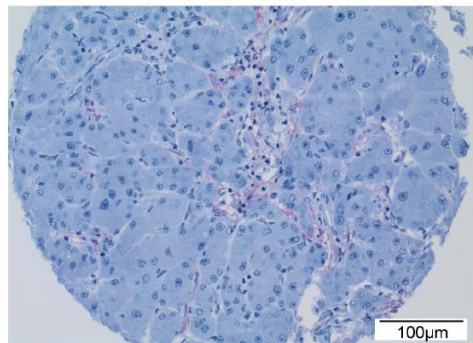

HCC

**Appendix Figure S2. Heterogeneous Endosialin expression on HCC tissue microarray punches.** Immunohistochemical stainings of Endosialin on 57 HCC and peritumorous liver parenchyma tissue microarray punches. Scale bars: as indicated. HCC=hepatocellular carcinoma.

### Appendix Figure S3

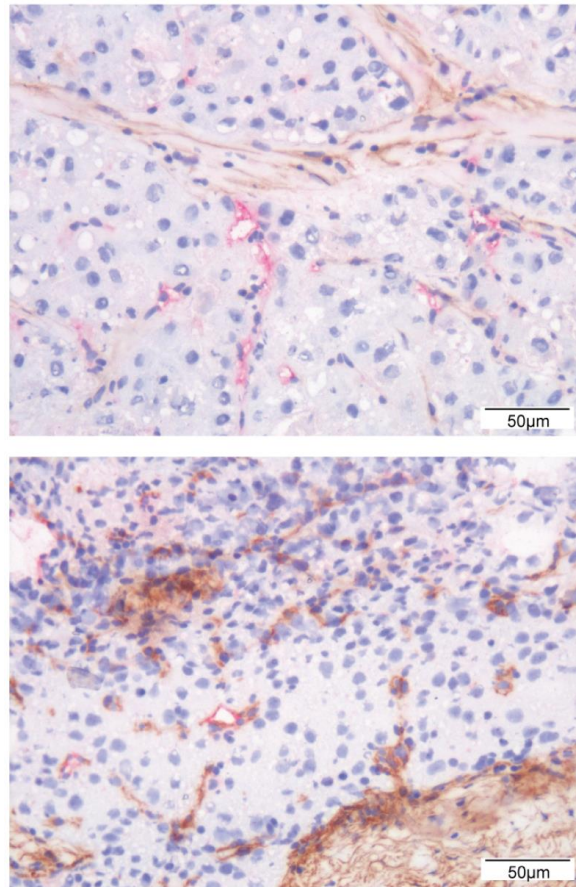

**Appendix Figure S3. Co-stainings of Endosialin and CD31 on human HCC.** Immunohistochemical double staining of Endosialin (brown) and CD31 (red) of different HCC samples (n=8). Scale bars: as indicated.

## Appendix Figure S4

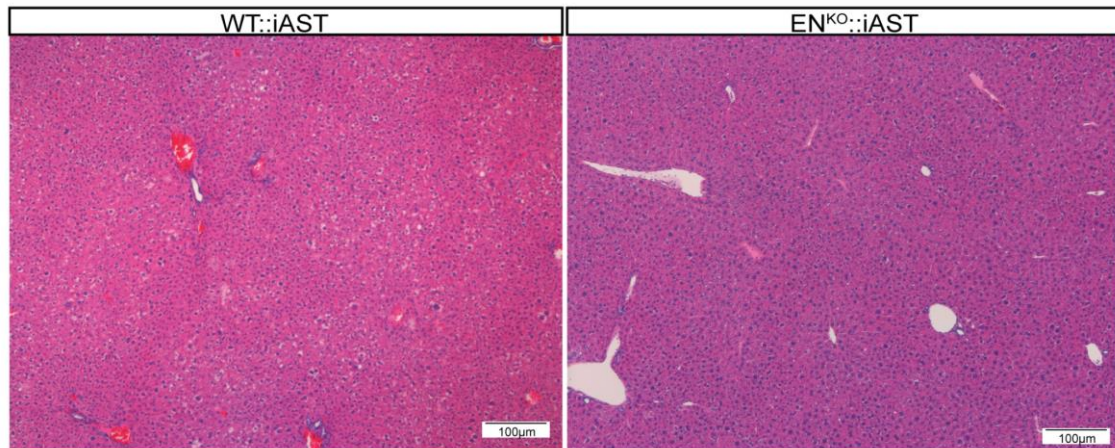

**Appendix Figure S4. Immunohistochemical analysis of non-tumorigenic WT and Endosialin-deficient livers.** HE stainings of WT::iAST and EN<sup>KO</sup>::iAST livers in un-challenged settings do not display any overt phenotype. Scale bars: as indicated.

**Appendix Figure S5**

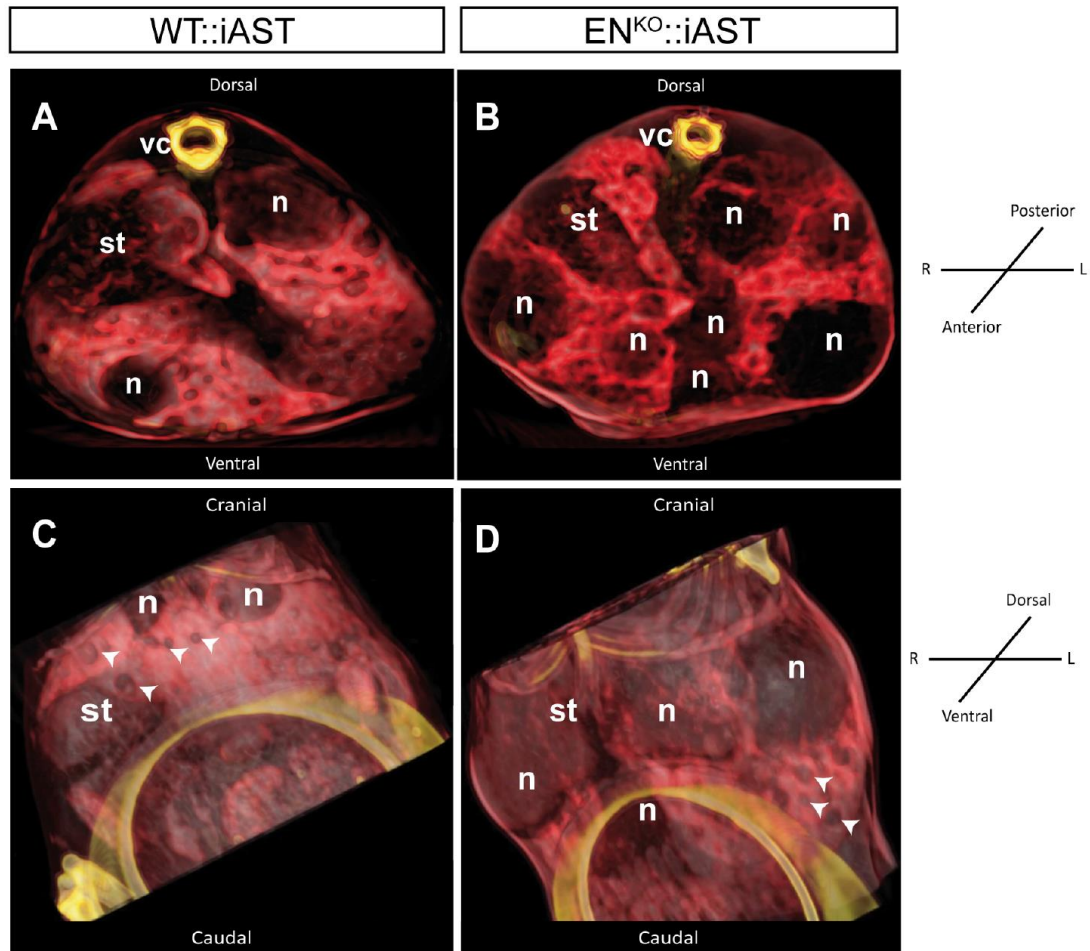

**Appendix Figure S5. Computer tomographical analysis of tumorigenic WT and Endosialin-deficient mice.** Computer tomography of WT::iAST (A, C,) and EN<sup>KO</sup>::iAST (B,D) mice seven weeks after tumor induction as described in Figure 2. 2-dimensionally and 3-dimensionally reconstructed images. n= nodule; st=stomach; vc= vertebral cord.

Appendix Figure S6

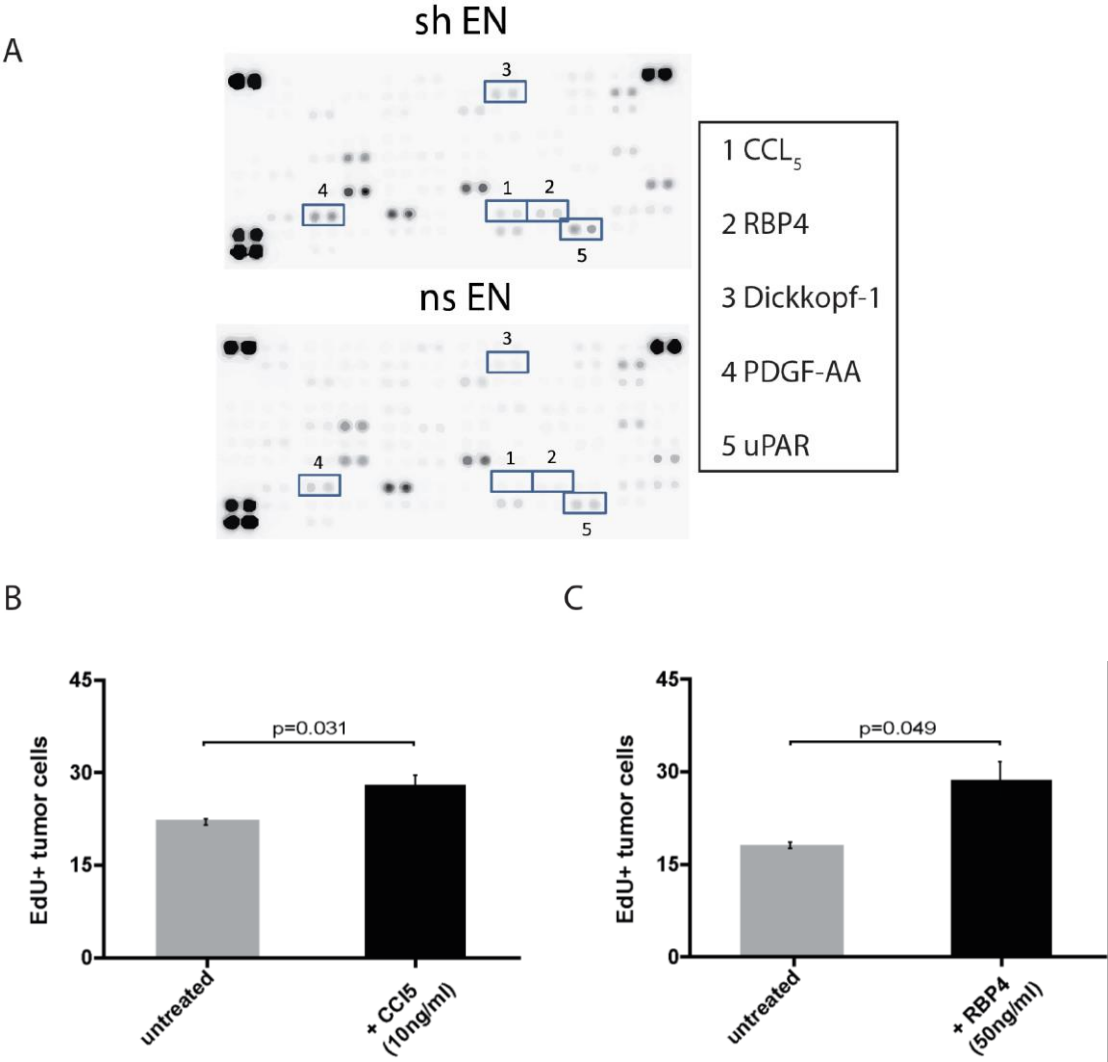

**Appendix Figure S6. Expression profiling and functional analysis of conditioned media from nsEN and shEN HSC.** Cytokine array of CM from nsEN and shEN HSC highlighting the top 5 differentially expressed cytokines (A). EdU proliferation assay of Huh7 tumor cells stimulated with the top 2 cytokine candidates: CCL5 (B) or RBP4 (C). n=1 with 3 technical replicates. Data are expressed as mean ± SD. Statistical analysis: Student’s t-test.



## Appendix Table S1.

List of cytokines. Human cytokine array from the conditioned media of shEN and nsEN HSC.

| Cytokine                    | nsEN   | shEN   | shEN/nsEN | Cytokine                            | nsEN  | shEN  | shEN/nsEN |
|-----------------------------|--------|--------|-----------|-------------------------------------|-------|-------|-----------|
| RANTES/CCL5                 | 2.32   | 14.63  | 6.31      | EGF                                 | 7.47  | 5.89  | 0.79      |
| RBP4                        | 3.57   | 18.31  | 5.13      | CRP                                 | 5.22  | 4.08  | 0.78      |
| DKK-1                       | 6.60   | 21.04  | 3.19      | BDNF                                | 4.69  | 3.66  | 0.78      |
| PDGF-AA                     | 22.49  | 59.18  | 2.63      | Ang-1                               | 2.66  | 2.04  | 0.77      |
| uPAR                        | 22.50  | 54.57  | 2.43      | IL-17A                              | 24.04 | 18.02 | 0.75      |
| CCL2/MCAF/MCP-1             | 58.57  | 132.85 | 2.27      | IL-3                                | 1.97  | 1.46  | 0.74      |
| Fit-3 Ligand                | 1.06   | 2.17   | 2.05      | FGF basic/FGF-2                     | 7.44  | 5.49  | 0.74      |
| IL-1 R4/ST2L                | 1.90   | 3.60   | 1.89      | IL-11                               | 7.10  | 5.21  | 0.73      |
| Cripto-1                    | 1.36   | 2.49   | 1.83      | Complement Factor D                 | 4.12  | 2.98  | 0.72      |
| Osteopontin (OPN)           | 7.19   | 12.74  | 1.77      | IL-18 Bpa                           | 1.58  | 1.14  | 0.72      |
| Complement Component C5/CSa | 0.93   | 1.48   | 1.59      | CXCL5                               | 2.96  | 2.11  | 0.71      |
| DPPIV/CD26/DPP4             | 0.59   | 0.94   | 1.59      | IL-16                               | 1.51  | 1.07  | 0.71      |
| TGFA                        | 0.34   | 0.52   | 1.51      | IL-6                                | 9.28  | 6.51  | 0.70      |
| FGF-7                       | 0.81   | 1.21   | 1.49      | Angiogenin                          | 1.51  | 1.04  | 0.69      |
| IGFBP-2                     | 1.06   | 1.55   | 1.46      | IL-27                               | 4.32  | 2.96  | 0.68      |
| MMP-9                       | 42.84  | 58.20  | 1.36      | IL-1b                               | 4.13  | 2.81  | 0.68      |
| Endoglin/CD105              | 8.89   | 11.03  | 1.24      | Vitamin D BP                        | 6.21  | 4.12  | 0.66      |
| Thrombospondin-1/TSP-1      | 17.63  | 21.85  | 1.24      | CXCL9/MIG                           | 2.96  | 1.95  | 0.66      |
| Relaxin-2/RLN2/RLXH2        | 2.62   | 3.16   | 1.21      | IL-19                               | 4.27  | 2.64  | 0.62      |
| MIF                         | 99.51  | 118.73 | 1.19      | Ang-2                               | 8.08  | 4.97  | 0.61      |
| CD14                        | 6.68   | 7.68   | 1.15      | IL-24                               | 5.26  | 3.23  | 0.61      |
| LIF                         | 1.42   | 1.54   | 1.09      | IL-1a                               | 6.12  | 3.71  | 0.61      |
| EMMPRIN                     | 42.89  | 46.29  | 1.08      | IL-22                               | 7.25  | 4.39  | 0.61      |
| Cxcl4/PF4                   | 2.15   | 2.31   | 1.08      | IL-32a/b/g                          | 3.02  | 1.82  | 0.60      |
| SHBG/ABP                    | 5.36   | 5.66   | 1.06      | Adiponectin                         | 5.89  | 3.54  | 0.60      |
| TFF3/TF                     | 5.63   | 5.94   | 1.05      | ICAM-1/CD54                         | 3.36  | 2.01  | 0.60      |
| CCL7/MCP-3/MARC             | 1.31   | 1.37   | 1.05      | IL-12 p40                           | 2.97  | 1.76  | 0.59      |
| GDF-15/MIC-1                | 3.11   | 3.25   | 1.04      | TNFa                                | 1.76  | 1.03  | 0.58      |
| CD71/TfR                    | 3.15   | 3.21   | 1.02      | CCL17/TARC                          | 3.11  | 1.79  | 0.58      |
| G-CSF                       | 0.66   | 0.68   | 1.02      | IL-1ra                              | 2.09  | 1.15  | 0.55      |
| Cystatin C                  | 2.40   | 2.39   | 0.99      | IFN-g                               | 5.88  | 3.21  | 0.55      |
| CD30/TNFRSF8                | 4.64   | 4.60   | 0.99      | Lipocalin-2                         | 5.24  | 2.84  | 0.54      |
| IL-13                       | 1.23   | 1.18   | 0.96      | BAFF/BLy5/TNFSF13B                  | 2.74  | 1.48  | 0.54      |
| CXCL11/I-TAC                | 0.71   | 0.68   | 0.96      | Kallikrein 3/PSA/KLK3               | 5.19  | 2.75  | 0.53      |
| Serpin E1                   | 239.90 | 231.04 | 0.96      | IL-33                               | 2.02  | 1.04  | 0.51      |
| IL-15                       | 249.04 | 239.28 | 0.95      | CD40 ligand/CD40L/TNFSF5/CD154/TRAP | 7.67  | 3.93  | 0.51      |
| CXCL10/IP-10                | 3.41   | 3.23   | 0.94      | IL-4                                | 2.01  | 1.01  | 0.50      |
| IGFBP-3                     | 3.49   | 3.29   | 0.94      | Fas Ligand                          | 2.82  | 1.37  | 0.49      |
| CCL3/CCL4/MIP-1a/b          | 1.03   | 0.96   | -0.36     | IL-2                                | 2.01  | 0.96  | 0.48      |
| IL-10                       | 2.55   | 2.34   | 0.92      | IL-5                                | 1.89  | 0.81  | 0.43      |
| FGF-19                      | 16.08  | 14.76  | 0.92      | RAGE                                | 1.03  | 0.41  | 0.40      |
| GM-CSF                      | 13.59  | 12.06  | 0.89      | Myeloperoxidase                     | 3.28  | 1.19  | 0.36      |
| PDGF-AB/BB                  | 1.16   | 1.03   | 0.88      | CCL20/MIP-3a                        | 0.94  | 0.31  | 0.33      |
| Pentraxin-3/PTX3/TSG-14     | 128.18 | 112.91 | 0.88      | Chitinase 3-like 1                  | 2.49  | 0.80  | 0.32      |
| CSF-1/M-CSF                 | 5.49   | 4.81   | 0.88      | Aggrecan 1                          | 2.73  | 0.84  | 0.31      |
| Cxcl12/SDF-1a/PBSF          | 12.79  | 11.16  | 0.87      | CXCL1/GRO-a                         | 2.44  | 0.72  | 0.29      |
| Resistin                    | 9.56   | 8.32   | 0.87      | Leptin/OB                           | 3.06  | 0.88  | 0.29      |
| VEGF                        | 4.16   | 3.61   | 0.87      | Growth hormone                      | 1.95  | 0.44  | 0.23      |
| IL-8                        | 71.49  | 61.13  | 0.86      | HGF                                 | 2.63  | 0.58  | 0.22      |
| IL-31                       | 2.19   | 1.86   | 0.85      | CCL19/MIP-3b                        | 0.64  | 0.09  | 0.14      |
| IL-23                       | 1.06   | 0.89   | 0.84      |                                     |       |       |           |
| IL-34                       | 0.51   | 0.41   | 0.81      |                                     |       |       |           |
