# Supplementary material for: Hepatic stellate cells limit hepatocellular carcinoma progression through the orphan receptor endosialin
Source: PubMed Central journal article supplement (PMC5452049; doi:10.15252/emmm.201607222), 2017-04-03
Supplement: EMMM-9-741-s003.pdf [file EMMM-9-741-s003.pdf]

Mogler et al.: Western blot IGF2 und tubulin (Fig. 3F)

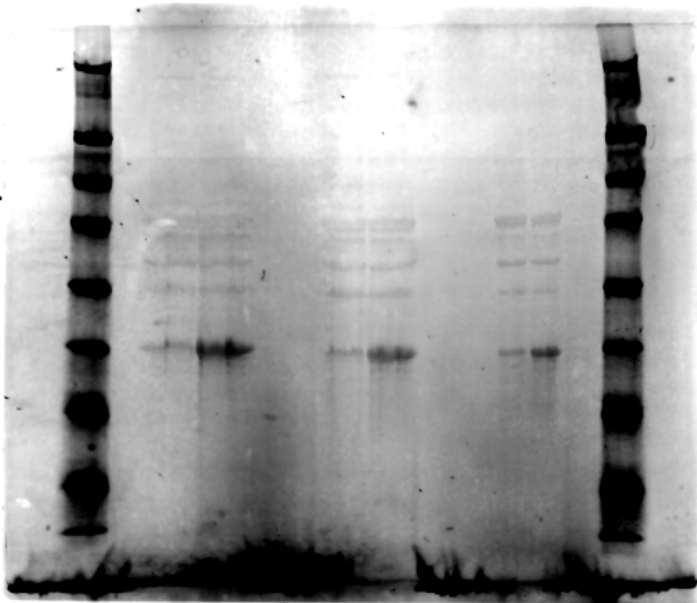

Western blot IGF2

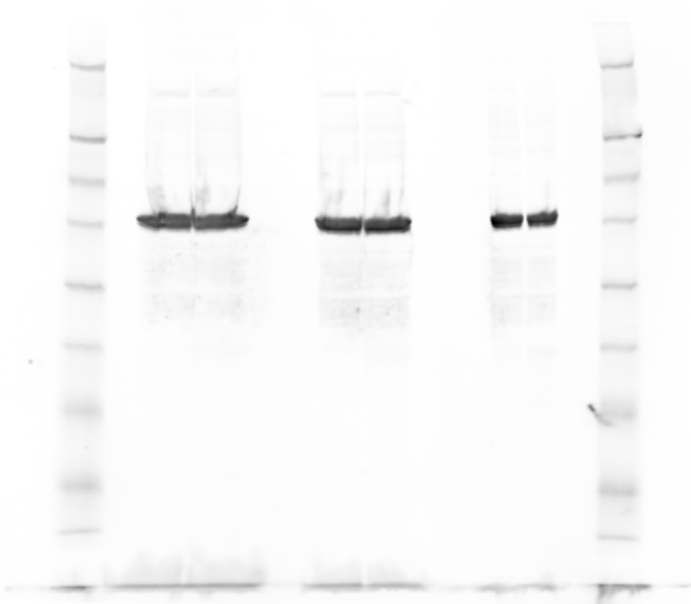

Western blot tubulin
